# Supplementary material for: DNA Hypermethylation and a Specific Methylation Spectrum on the X Chromosome in Turner Syndrome as Determined by Nanopore Sequencing
Source: MDPI journal article supplement (doi:10.3390/jpm12060872), 2022-05-26
Supplement: s1 [file s1]

## Supplementary Materials:

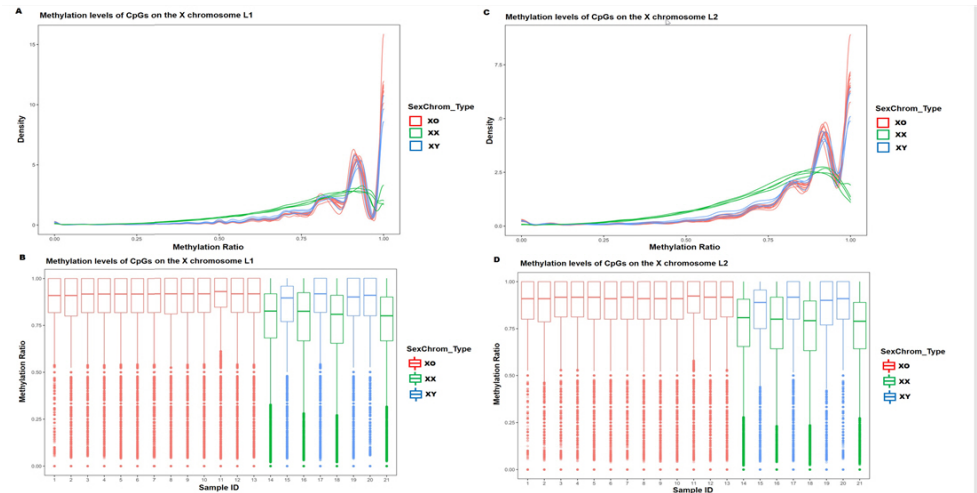

**Figure S1.** The methylation levels of 13 TS individuals and 8 healthy controls in the L1 and L2 regions on the chrX. The methylation density (A) and methylation ratio (B) of each sample in the L1 regions. The methylation density (C) and methylation ratio (D) of each sample in the L2 regions. (Red: TS, Green: female controls, and Blue: male controls).

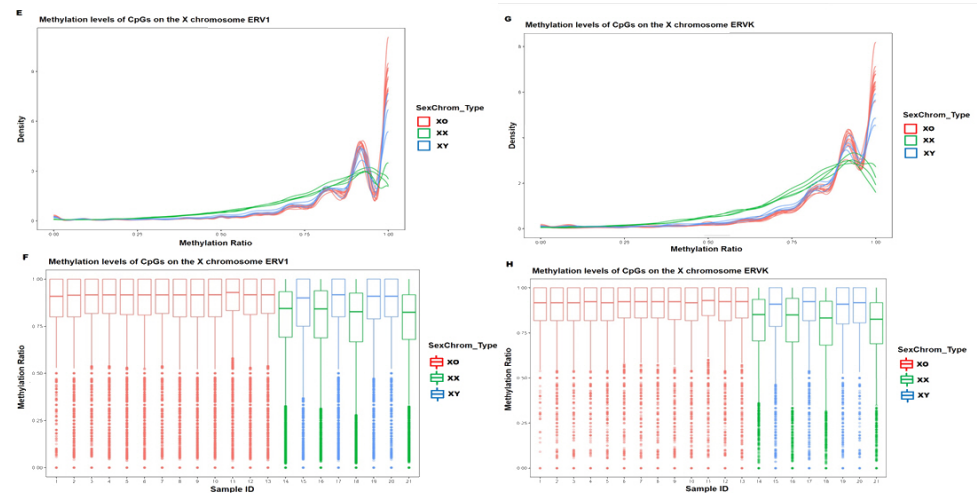

**Figure S2.** The methylation levels of 13 TS individuals and 8 healthy controls in the ERV1 and ERVK regions on the chrX. The methylation density (E) and methylation ratio (F) of each sample in the ERV1 regions. The methylation density (G) and methylation ratio (H) of each sample in the ERVK regions. (Red: TS, Green: female controls, and Blue: male controls).

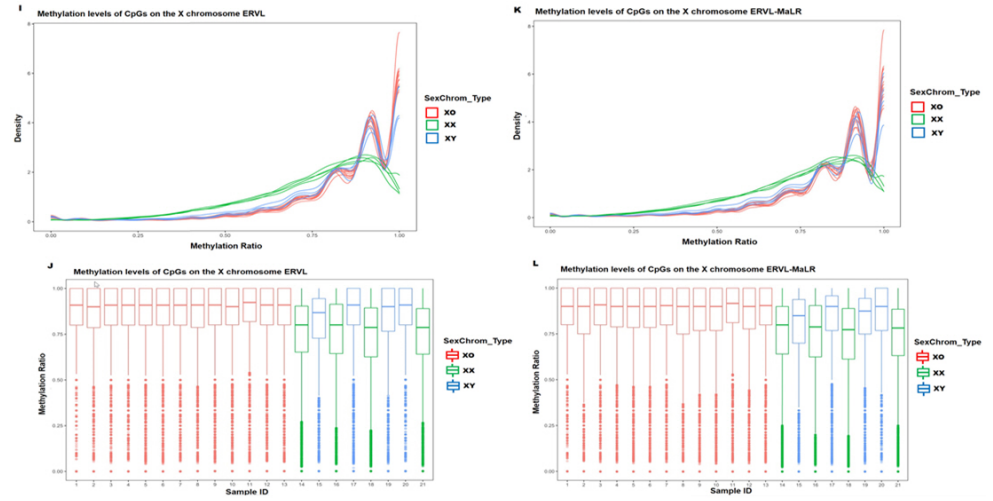

**Figure S3.** The methylation levels of 13 TS individuals and 8 healthy controls in the ERVL and ERVL-MaLR regions on the chrX. The methylation density (I) and methylation ratio (J) of each sample in ERVL regions. The methylation density (K) and methylation ratio (L) of each sample in the ERVL-MaLR regions. (Red: TS, Green: female controls, and Blue: male controls).

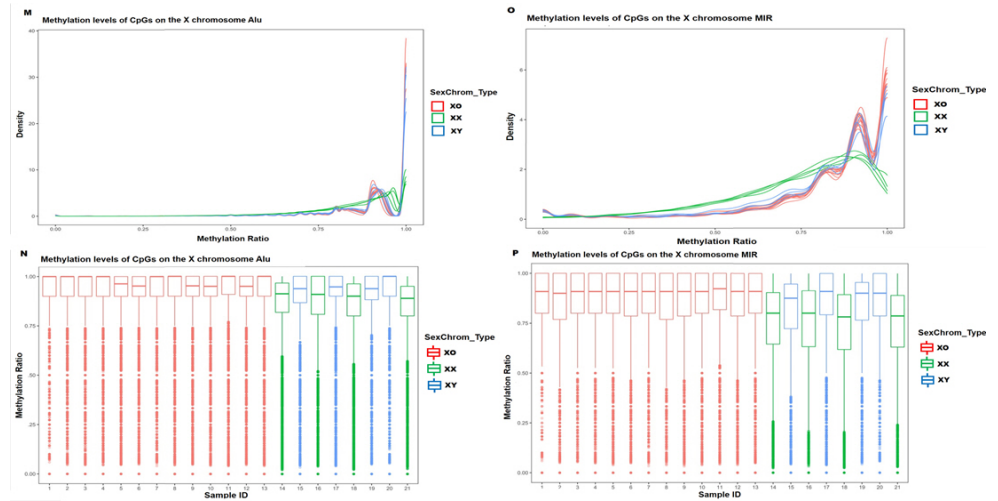

**Figure S4.** The methylation levels of 13 TS individuals and 8 healthy controls in the Alu and MIR regions on the chrX. The methylation density (M) and methylation ratio (N) of each sample in Alu regions. The methylation density (O) and methylation ratio (P) of each sample in the MIR regions. (Red: TS, Green: female controls, and Blue: male controls).

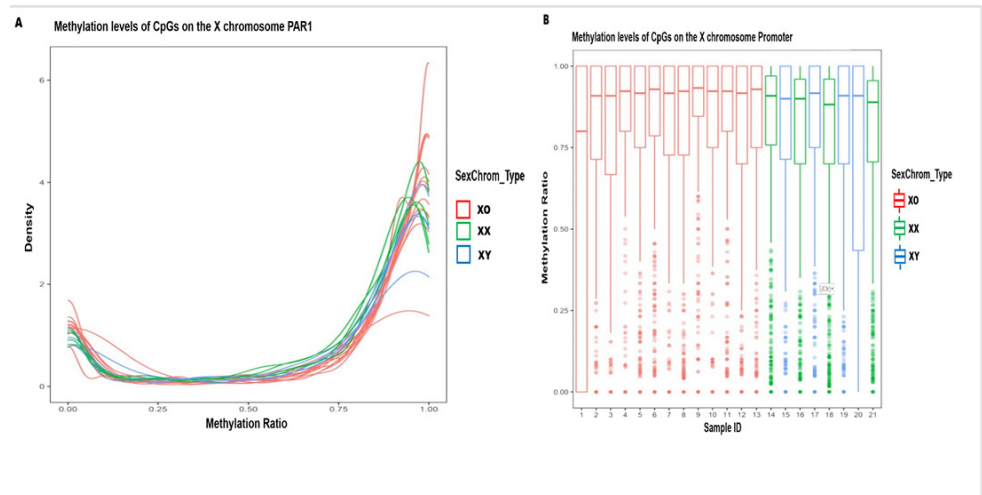

**Figure S5.** The methylation levels of 13 TS individuals and 8 healthy controls in the PAR1 regions on the chrX. The methylation density (A) and methylation ratio (B) of each sample in the PAR1

regions. (Red: TS, Green: female controls, and Blue: male controls).

**Table S1.** The phenotypes and genetic information of patients with 45X0 Turner syndrome.

[illegible]

|                                           |   |   |   |   |   |   |   |   |   |   |   |   |   |             |
|-------------------------------------------|---|---|---|---|---|---|---|---|---|---|---|---|---|-------------|
| <b>Cardiac malformation</b>               |   |   |   |   |   |   |   |   |   |   |   |   |   | <b>4/13</b> |
| Bicuspid aortic valve (HP:0001647)        | - | - | - | + | - | - | - | - | + | - | - | - | + | 3/13        |
| Aortic root dilation (HP:0002616)         | - | + | - | + | - | - | - | - | + | - | - | - | - | 3/13        |
| <b>Renal malformation</b>                 |   |   |   |   |   |   |   |   |   |   |   |   |   | <b>4/13</b> |
| Medullary nephrocalcinosis (HP:0012408)   | - | - | - | - | - | - | - | - | - | + | - | - | - | 1/13        |
| Horseshoe kidney (HP:0000085)             | - | - | - | - | - | - | - | - | - | - | - | + | + | 2/13        |
| Hydronephrosis (HP:0000126)               | - | - | - | - | - | - | - | - | - | - | - | + | - | 1/13        |
| Nephrolithiasis (HP:0000787)              | - | + | - | - | - | - | - | - | - | - | - | - | - | 1/13        |
| Specific learning disability (HP:0001328) | + | + | - | - | - | - | - | - | - | - | - | - | - | 2/13        |
| Hypothyroidism (HP:0000821)               | - | + | + | - | - | - | - | - | - | - | - | - | - | 2/13        |

\* Origin of chrX: M, maternal origin and P, paternal origin.

**Table S2.** Differentially methylated genes identified among the three groups of Turner syndrome 45X0 and controls 46XY and 46XX.

| Gene             | Set        | Number |
|------------------|------------|--------|
| CNTNAP3          | XO/XXhyper | 8      |
| BCOR             | XO/XXhyper |        |
| AC004870.3       | XO/XXhyper |        |
| AK2              | XO/XXhyper |        |
| MYT1L            | XO/XXhyper |        |
| OPCML            | XO/XXhyper |        |
| GRK1             | XO/XXhyper |        |
| RP11-453F18__B.1 | XO/XXhyper |        |
| MVB12B           | XO/XXhypo  | 117    |
| CXorf40A         | XO/XXhypo  |        |
| RPL10            | XO/XXhypo  |        |
| RP4-537K23.4     | XO/XXhypo  |        |
| NDUFA1           | XO/XXhypo  |        |
| VMA21            | XO/XXhypo  |        |
| KLF8             | XO/XXhypo  |        |
| RPL36A           | XO/XXhypo  |        |
| RPL36A-HNRNP2    | XO/XXhypo  |        |
| HUWE1            | XO/XXhypo  |        |
| TBC1D25          | XO/XXhypo  |        |
| AF196779.12      | XO/XXhypo  |        |
| WDR45            | XO/XXhypo  |        |
| ZNF630           | XO/XXhypo  |        |
| PIM2             | XO/XXhypo  |        |
| F8               | XO/XXhypo  |        |
| RP11-85L21.4     | XO/XXhypo  |        |
| SYP              | XO/XXhypo  |        |
| TIMM17B          | XO/XXhypo  |        |
| IKBKG            | XO/XXhypo  |        |
| NUDT10           | XO/XXhypo  |        |
| TMEM255A         | XO/XXhypo  |        |
| ELK1             | XO/XXhypo  |        |
| FAM127B          | XO/XXhypo  |        |
| CCDC22           | XO/XXhypo  |        |
| TMEM185A         | XO/XXhypo  |        |
| BTBD11           | XO/XXhypo  |        |
| WDR13            | XO/XXhypo  |        |
| ESX1             | XO/XXhypo  |        |

---

|              |           |
|--------------|-----------|
| PHF8         | XO/XXhypo |
| ZNF674-AS1   | XO/XXhypo |
| PNCK         | XO/XXhypo |
| MAGED2       | XO/XXhypo |
| KIAA2022     | XO/XXhypo |
| WNK3         | XO/XXhypo |
| G6PD         | XO/XXhypo |
| CHST7        | XO/XXhypo |
| ARHGEF9      | XO/XXhypo |
| TAF9B        | XO/XXhypo |
| TM4SF2       | XO/XXhypo |
| TSPAN7       | XO/XXhypo |
| EIF2AK4      | XO/XXhypo |
| BCORL1       | XO/XXhypo |
| PCDH19       | XO/XXhypo |
| RP3-326L13.2 | XO/XXhypo |
| SCML1        | XO/XXhypo |
| CACNA1F      | XO/XXhypo |
| WAS          | XO/XXhypo |
| GPR50-AS1    | XO/XXhypo |
| RP4-769N13.6 | XO/XXhypo |
| RP4-769N13.7 | XO/XXhypo |
| RAB33A       | XO/XXhypo |
| SYN1         | XO/XXhypo |
| ATP6AP1      | XO/XXhypo |
| TRMT2B       | XO/XXhypo |
| TRMT2B-AS1   | XO/XXhypo |
| HS6ST2       | XO/XXhypo |
| TIMM8A       | XO/XXhypo |
| MORC4        | XO/XXhypo |
| MAGIX        | XO/XXhypo |
| IRAK1        | XO/XXhypo |
| DLG3         | XO/XXhypo |
| OTUD5        | XO/XXhypo |
| AR           | XO/XXhypo |
| AC115618.1   | XO/XXhypo |
| HAUS7        | XO/XXhypo |
| NHS          | XO/XXhypo |
| MAGT1        | XO/XXhypo |
| NUDT11       | XO/XXhypo |
| NDUFB11      | XO/XXhypo |
| PTCHD1       | XO/XXhypo |
| CROCC        | XO/XXhypo |
| U1           | XO/XXhypo |
| BHLHB9       | XO/XXhypo |
| HDAC6        | XO/XXhypo |
| EBP          | XO/XXhypo |
| LINC00086    | XO/XXhypo |
| LONRF3       | XO/XXhypo |
| ZBTB33       | XO/XXhypo |
| BEX4         | XO/XXhypo |
| ELF4         | XO/XXhypo |
| NKAPP1       | XO/XXhypo |
| TAZ          | XO/XXhypo |
| RP11-66N11.8 | XO/XXhypo |
| ZNF41        | XO/XXhypo |
| HMGB3        | XO/XXhypo |
| EMD          | XO/XXhypo |
| SLC25A5-AS1  | XO/XXhypo |
| STARD8       | XO/XXhypo |
| MID1IP1      | XO/XXhypo |
| MOSPD1       | XO/XXhypo |
| FLNA         | XO/XXhypo |
| LANCL3       | XO/XXhypo |
| CXorf40B     | XO/XXhypo |
| MAGEE1       | XO/XXhypo |

---

|                  |            |     |
|------------------|------------|-----|
| TAF7L            | XO/XXhypo  |     |
| RAI2             | XO/XXhypo  |     |
| SAMD11           | XO/XXhypo  |     |
| SLC25A5          | XO/XXhypo  |     |
| ZMYM3            | XO/XXhypo  |     |
| BEX1             | XO/XXhypo  |     |
| SRPX             | XO/XXhypo  |     |
| IDS              | XO/XXhypo  |     |
| ARHGAP6          | XO/XXhypo  |     |
| UBL4A            | XO/XXhypo  |     |
| RBMX2            | XO/XXhypo  |     |
| PRRG1            | XO/XXhypo  |     |
| PGK1             | XO/XXhypo  |     |
| C1GALT1C1        | XO/XXhypo  |     |
| AFF2             | XO/XXhypo  |     |
| FMR1             | XO/XXhypo  |     |
| LINC00629        | XO/XXhypo  |     |
| SRPK3            | XO/XXhypo  |     |
| IL13RA1          | XO/XXhypo  |     |
| DOCK11           | XO/XXhypo  |     |
| HOOK2            | XO/XXhypo  |     |
| DNASE1L1         | XO/XXhypo  |     |
| HOXB3            | XO/XYhyper | 3   |
| HOXB-AS3         | XO/XYhyper |     |
| DTX2             | XO/XYhyper |     |
| TAF1             | XO/XYhypo  |     |
| MVB12B           | XO/XYhypo  |     |
| TNS1             | XO/XYhypo  |     |
| AC093609.1       | XO/XYhypo  | 16  |
| MPL              | XO/XYhypo  |     |
| EIF2AK4          | XO/XYhypo  |     |
| FOXI2            | XO/XYhypo  |     |
| BTBD11           | XO/XYhypo  |     |
| HOXA3            | XO/XYhypo  |     |
| HOXA-AS2         | XO/XYhypo  |     |
| HOXA4            | XO/XYhypo  |     |
| RP1-170O19.22    | XO/XYhypo  |     |
| SPRN             | XO/XYhypo  |     |
| CYP2E1           | XO/XYhypo  |     |
| NAPRT1           | XO/XYhypo  |     |
| CTU1             | XO/XYhypo  |     |
| BCOR             | XY/XXhyper | 8   |
| TAF1             | XY/XXhyper |     |
| RP11-453F18__B.1 | XY/XXhyper |     |
| LMTK3            | XY/XXhyper |     |
| AK2              | XY/XXhyper |     |
| SPRN             | XY/XXhyper |     |
| CYP2E1           | XY/XXhyper |     |
| AC093609.1       | XY/XXhyper |     |
| DNASE1L1         | XY/XXhypo  | 121 |
| FAM156B          | XY/XXhypo  |     |
| DOCK11           | XY/XXhypo  |     |
| AMMECR1          | XY/XXhypo  |     |
| SSR4             | XY/XXhypo  |     |
| FZD1             | XY/XXhypo  |     |
| BEX1             | XY/XXhypo  |     |
| ARX              | XY/XXhypo  |     |
| EFNB1            | XY/XXhypo  |     |
| C1GALT1C1        | XY/XXhypo  |     |
| FAM157C          | XY/XXhypo  |     |
| GPC3             | XY/XXhypo  |     |
| TSPAN6           | XY/XXhypo  |     |
| UBL4A            | XY/XXhypo  |     |
| FMR1             | XY/XXhypo  |     |
| HS6ST2           | XY/XXhypo  |     |
| FAM156A          | XY/XXhypo  |     |

---

|                |           |
|----------------|-----------|
| IDS            | XY/XXhypo |
| AFF2           | XY/XXhypo |
| RBMX2          | XY/XXhypo |
| NHS            | XY/XXhypo |
| SLITRK4        | XY/XXhypo |
| SLC25A5        | XY/XXhypo |
| PRRG1          | XY/XXhypo |
| TM4SF2         | XY/XXhypo |
| PABPC1L2A      | XY/XXhypo |
| KIAA2022       | XY/XXhypo |
| SRPX           | XY/XXhypo |
| STARD8         | XY/XXhypo |
| RAI2           | XY/XXhypo |
| PGK1           | XY/XXhypo |
| LANCL3         | XY/XXhypo |
| IKBK           | XY/XXhypo |
| RP11-66N11.8   | XY/XXhypo |
| FLNA           | XY/XXhypo |
| ARHGAP6        | XY/XXhypo |
| CXorf40B       | XY/XXhypo |
| MOSPD1         | XY/XXhypo |
| WNK3           | XY/XXhypo |
| MID1IP1        | XY/XXhypo |
| NUDT11         | XY/XXhypo |
| HMGB3          | XY/XXhypo |
| TAF7L          | XY/XXhypo |
| PCDH19         | XY/XXhypo |
| SLC25A5-AS1    | XY/XXhypo |
| ZBTB33         | XY/XXhypo |
| ZNF41          | XY/XXhypo |
| RP4-537K23.4   | XY/XXhypo |
| EMD            | XY/XXhypo |
| SOWAHD         | XY/XXhypo |
| LONRF3         | XY/XXhypo |
| BCORL1         | XY/XXhypo |
| ZMYM3          | XY/XXhypo |
| TAZ            | XY/XXhypo |
| EBP            | XY/XXhypo |
| NKAPP1         | XY/XXhypo |
| ELF4           | XY/XXhypo |
| HDAC6          | XY/XXhypo |
| LINC00086      | XY/XXhypo |
| GPR50-AS1      | XY/XXhypo |
| NDUFB11        | XY/XXhypo |
| PTCHD1         | XY/XXhypo |
| PHF8           | XY/XXhypo |
| BHLHB9         | XY/XXhypo |
| WDR45          | XY/XXhypo |
| RPL36A-HNRNPH2 | XY/XXhypo |
| AC115618.1     | XY/XXhypo |
| HAUS7          | XY/XXhypo |
| OTUD5          | XY/XXhypo |
| MAGT1          | XY/XXhypo |
| DLG3           | XY/XXhypo |
| MAGIX          | XY/XXhypo |
| IRAK1          | XY/XXhypo |
| MORC4          | XY/XXhypo |
| AR             | XY/XXhypo |
| ZNF630         | XY/XXhypo |
| TIMM8A         | XY/XXhypo |
| RP3-326L13.2   | XY/XXhypo |
| SYN1           | XY/XXhypo |
| TRMT2B         | XY/XXhypo |
| TRMT2B-AS1     | XY/XXhypo |
| ZNF75D         | XY/XXhypo |
| ATP6AP1        | XY/XXhypo |

---

---

|              |           |
|--------------|-----------|
| RP4-769N13.6 | XY/XXhypo |
| RP4-769N13.7 | XY/XXhypo |
| WAS          | XY/XXhypo |
| NUDT10       | XY/XXhypo |
| CACNA1F      | XY/XXhypo |
| RAB33A       | XY/XXhypo |
| SCML1        | XY/XXhypo |
| TSPAN7       | XY/XXhypo |
| CHST7        | XY/XXhypo |
| HUWE1        | XY/XXhypo |
| G6PD         | XY/XXhypo |
| ZNF674-AS1   | XY/XXhypo |
| MAGED2       | XY/XXhypo |
| SYP          | XY/XXhypo |
| WDR13        | XY/XXhypo |
| TAF9B        | XY/XXhypo |
| PNMA6A       | XY/XXhypo |
| ARHGEF9      | XY/XXhypo |
| CCDC22       | XY/XXhypo |
| FAM127B      | XY/XXhypo |
| TMEM185A     | XY/XXhypo |
| ESX1         | XY/XXhypo |
| TMEM255A     | XY/XXhypo |
| PNCK         | XY/XXhypo |
| ELK1         | XY/XXhypo |
| TIMM17B      | XY/XXhypo |
| F8           | XY/XXhypo |
| RP11-85L21.4 | XY/XXhypo |
| PIM2         | XY/XXhypo |
| AF196779.12  | XY/XXhypo |
| TBC1D25      | XY/XXhypo |
| RPL36A       | XY/XXhypo |
| RPL10        | XY/XXhypo |
| CXorf40A     | XY/XXhypo |
| VMA21        | XY/XXhypo |
| KLF8         | XY/XXhypo |
| NDUFA1       | XY/XXhypo |
| SRPK3        | XY/XXhypo |

---



**Table S3.** Enriched GO and pathway lists.

| Category                      | Category ID | GO         | Description                                                         | PARENT_GO                                                           | LogP | Enrichment | Z-score | #TotalGen<br>eInLibrary | #GeneIn<br>nGO | #GeneIn<br>HitList | #GeneIn<br>GOAnd<br>HitList | %InGO | STDV<br>%InGO | GeneID                                                       | Hits                                                                         | Log(q-value) | Gene<br>List |
|-------------------------------|-------------|------------|---------------------------------------------------------------------|---------------------------------------------------------------------|------|------------|---------|-------------------------|----------------|--------------------|-----------------------------|-------|---------------|--------------------------------------------------------------|------------------------------------------------------------------------------|--------------|--------------|
| GO<br>Biological<br>Processes | 19          | GO:000423  | mitophagy                                                           | 19_GO:0008152<br>metabolic<br>process                               | -5.2 | 33         | 11      | 30,242                  | 28             | 132                | 4                           | 3     | 1.5           | 292 6901 10013 <br>10075                                     | SLC25A5 TAFAZZIN <br>HDAC6 HUWE1                                             | -0.82        | MyList       |
| GO<br>Biological<br>Processes | 19          | GO:0090042 | tubulin<br>deacetylation                                            | 19_GO:0008152<br>metabolic<br>process                               | -4.6 | 53         | 12      | 30,242                  | 13             | 132                | 3                           | 2.3   | 1.3           | 2316 10013 5627<br>1                                         | FLNA HDAC6 BEX4                                                              | -0.78        | MyList       |
| GO<br>Biological<br>Processes | 19          | GO:000422  | autophagy of<br>mitochondrion                                       | 19_GO:0008152<br>metabolic<br>process                               | -4.5 | 14         | 7.8     | 30,242                  | 81             | 132                | 5                           | 3.8   | 1.7           | 292 6901 10013 <br>10075 11152                               | SLC25A5 TAFAZZIN <br>HDAC6 HUWE1 WD<br>R45                                   | -0.78        | MyList       |
| GO<br>Biological<br>Processes | 19          | GO:0061726 | mitochondrion<br>disassembly                                        | 19_GO:0009987<br>cellular process                                   | -4.5 | 14         | 7.8     | 30,242                  | 81             | 132                | 5                           | 3.8   | 1.7           | 292 6901 10013 <br>10075 11152                               | SLC25A5 TAFAZZIN <br>HDAC6 HUWE1 WD<br>R45                                   | -0.78        | MyList       |
| GO<br>Biological<br>Processes | 19          | GO:0051090 | regulation of DNA-<br>binding<br>transcription factor<br>activity   | 19_GO:0050789<br>regulation of<br>biological<br>process             | -3.9 | 4.7        | 5.2     | 30,242                  | 440            | 132                | 9                           | 6.8   | 2.2           | 367 2316 3654 6<br>872 8321 8517 2<br>8952 55859 4402<br>75  | AR FLNA IRAK1 TA<br>F1 FZD1 IKBK CCD<br>C22 BEX1 EIF2AK4                     | -0.25        | MyList       |
| GO<br>Biological<br>Processes | 19          | GO:1903008 | organelle<br>disassembly                                            | 19_GO:0009987<br>cellular process                                   | -3.8 | 10         | 6.4     | 30,242                  | 114            | 132                | 5                           | 3.8   | 1.7           | 292 6901 10013 <br>10075 11152                               | SLC25A5 TAFAZZIN <br>HDAC6 HUWE1 WD<br>R45                                   | -0.25        | MyList       |
| GO<br>Biological<br>Processes | 19          | GO:0043123 | positive regulation<br>of I-kappaB<br>kinase/NF-kappaB<br>signaling | 19_GO:0048518<br>positive<br>regulation of<br>biological<br>process | -3.8 | 7.4        | 5.8     | 30,242                  | 186            | 132                | 6                           | 4.5   | 1.8           | 2316 3654 7105 <br>8517 11040 2895<br>2                      | FLNA IRAK1 TSPAN<br>6 IKBK PIM2 CCDC<br>22                                   | -0.25        | MyList       |
| GO<br>Biological<br>Processes | 19          | GO:0061912 | selective autophagy                                                 | 19_GO:0008152<br>metabolic<br>process                               | -3.6 | 13         | 6.8     | 30,242                  | 69             | 132                | 4                           | 3     | 1.5           | 292 6901 10013 <br>10075                                     | SLC25A5 TAFAZZIN <br>HDAC6 HUWE1                                             | -0.16        | MyList       |
| GO<br>Biological<br>Processes | 19          | GO:0016236 | macroautophagy                                                      | 19_GO:0008152<br>metabolic<br>process                               | -3.5 | 5.4        | 5.1     | 30,242                  | 295            | 132                | 7                           | 5.3   | 2             | 292 4943 6901 8<br>517 10013 10075<br> 11152                 | SLC25A5 TBC1D25 T<br>FAZZIN IKBK HD<br>AC6 HUWE1 WDR45                       | -0.08        | MyList       |
| GO<br>Biological<br>Processes | 19          | GO:0007005 | mitochondrion<br>organization                                       | 19_GO:0009987<br>cellular process                                   | -3.4 | 4.1        | 4.6     | 30,242                  | 509            | 132                | 9                           | 6.8   | 2.2           | 292 1678 4694 6<br>901 10013 10075<br> 10245 11152 54<br>539 | SLC25A5 TIMM8A N<br>DUF41 TAFAZZIN H<br>DAC6 HUWE1 TIMM<br>17B WDR45 NDUFB11 | -0.056       | MyList       |
| WikiPath<br>ways              | 27          | WP2858     | Ectoderm<br>differentiation                                         |                                                                     | -3.4 | 8          | 5.5     | 30,242                  | 144            | 132                | 5                           | 3.8   | 1.7           | 10013 23133 232<br>29 54880 170302                           | HDAC6 PHF8 ARHG<br>EF9 BCOR ARX                                              | -0.056       | MyList       |

|                         |    |               |                                                                     |                                                |      |     |     |        |     |     |    |     |     |                                                   |                                                               |        |        |
|-------------------------|----|---------------|---------------------------------------------------------------------|------------------------------------------------|------|-----|-----|--------|-----|-----|----|-----|-----|---------------------------------------------------|---------------------------------------------------------------|--------|--------|
| GO Biological Processes | 19 | GO:0046777    | protein autophosphorylation                                         | 19_GO:0008152 metabolic process                | -3.3 | 6.1 | 5.1 | 30,242 | 227 | 132 | 6  | 4.5 | 1.8 | 3654 6011 6872 11040 65267 440275                 | IRAK1 GRK1 TAF1 PI M2 WNK3 EIF2AK4                            | -0.056 | MyList |
| GO Biological Processes | 19 | GO:0061919    | process utilizing autophagic mechanism                              | 19_GO:0009987 cellular process                 | -3.3 | 3.9 | 4.5 | 30,242 | 528 | 132 | 9  | 6.8 | 2.2 | 292 4943 6901 8406 8517 10013 10075 11040 11152   | SLC25A5 TBC1D25 T AFAZZIN SRPX IKBK G HDAC6 HUWE1 PI M2 WDR45 | -0.056 | MyList |
| GO Biological Processes | 19 | GO:0006914    | autophagy                                                           | 19_GO:0008152 metabolic process                | -3.3 | 3.9 | 4.5 | 30,242 | 528 | 132 | 9  | 6.8 | 2.2 | 292 4943 6901 8406 8517 10013 10075 11040 11152   | SLC25A5 TBC1D25 T AFAZZIN SRPX IKBK G HDAC6 HUWE1 PI M2 WDR45 | -0.056 | MyList |
| Reactome Gene Sets      | 6  | R-HSA-9609507 | Protein localization                                                |                                                | -3.1 | 7   | 5.1 | 30,242 | 163 | 132 | 5  | 3.8 | 1.7 | 1678 2010 6901 8266 10245                         | TIMM8A EMD TAFA ZZIN UBL4A TIMM17 B                           | 0      | MyList |
| GO Biological Processes | 19 | GO:0043122    | regulation of I-kappaB kinase/NF-kappaB signaling                   | 19_GO:0023052 signaling                        | -3.1 | 5.5 | 4.7 | 30,242 | 249 | 132 | 6  | 4.5 | 1.8 | 2316 3654 7105 8517 11040 28952                   | FLNA IRAK1 TSPAN 6 IKBK G PIM2 CCDC 22                        | 0      | MyList |
| Reactome Gene Sets      | 6  | R-HSA-9012999 | RHO GTPase cycle                                                    |                                                | -3.1 | 4.1 | 4.4 | 30,242 | 449 | 132 | 8  | 6.1 | 2.1 | 395 537 2010 4810 7454 9754 23229 139818          | ARHGAP6 ATP6AP1  EMD NHS WAS STA RD8 ARHGEF9 DOC K11          | 0      | MyList |
| KEGG Pathway            | 24 | ko03022       | Basal transcription factors                                         |                                                | -3   | 15  | 6.3 | 30,242 | 45  | 132 | 3  | 2.3 | 1.3 | 6872 51616 54457                                  | TAF1 TAF9B TAF7L                                              | 0      | MyList |
| GO Biological Processes | 19 | GO:0051091    | positive regulation of DNA-binding transcription factor activity    | 19_GO:0050789 regulation of biological process | -3   | 5.3 | 4.6 | 30,242 | 260 | 132 | 6  | 4.5 | 1.8 | 367 3654 6872 8321 8517 55859                     | AR IRAK1 TAF1 FZD 1 IKBK G BEX1                               | 0      | MyList |
| Reactome Gene Sets      | 6  | R-HSA-194315  | Signaling by Rho GTPases                                            |                                                | -3   | 3.2 | 4   | 30,242 | 707 | 132 | 10 | 7.6 | 2.3 | 367 395 537 2010 2316 4810 7454 9754 23229 139818 | AR ARHGAP6 ATP6 AP1 EMD FLNA NH S WAS STARD8 ARH GEF9 DOCK11  | 0      | MyList |
| Reactome Gene Sets      | 6  | R-HSA-76042   | RNA Polymerase II Transcription Initiation And Promoter Clearance   |                                                | -2.9 | 15  | 6.2 | 30,242 | 47  | 132 | 3  | 2.3 | 1.3 | 6872 51616 54457                                  | TAF1 TAF9B TAF7L                                              | 0      | MyList |
| Reactome Gene Sets      | 6  | R-HSA-73779   | RNA Polymerase II Transcription Pre-Initiation And Promoter Opening |                                                | -2.9 | 15  | 6.2 | 30,242 | 47  | 132 | 3  | 2.3 | 1.3 | 6872 51616 54457                                  | TAF1 TAF9B TAF7L                                              | 0      | MyList |
| Reactome Gene Sets      | 6  | R-HSA-73776   | RNA Polymerase II Promoter Escape                                   |                                                | -2.9 | 15  | 6.2 | 30,242 | 47  | 132 | 3  | 2.3 | 1.3 | 6872 51616 54457                                  | TAF1 TAF9B TAF7L                                              | 0      | MyList |
| Reactome Gene Sets      | 6  | R-HSA-75953   | RNA Polymerase II Transcription Initiation                          |                                                | -2.9 | 15  | 6.2 | 30,242 | 47  | 132 | 3  | 2.3 | 1.3 | 6872 51616 54457                                  | TAF1 TAF9B TAF7L                                              | 0      | MyList |

|                         |    |               |                                                                  |       |     |     |        |     |     |    |     |     |                                                         |                                                            |                                               |        |        |
|-------------------------|----|---------------|------------------------------------------------------------------|-------|-----|-----|--------|-----|-----|----|-----|-----|---------------------------------------------------------|------------------------------------------------------------|-----------------------------------------------|--------|--------|
| Reactome Gene Sets      | 6  | R-HSA-167162  | RNA Polymerase II HIV Promoter Escape                            | -2.9  | 15  | 6.2 | 30,242 | 47  | 132 | 3  | 2.3 | 1.3 | 6872 51616 54457                                        | TAF1 TAF9B TAF7L                                           | 0                                             | MyList |        |
| Reactome Gene Sets      | 6  | R-HSA-167161  | HIV Transcription Initiation                                     | -2.9  | 15  | 6.2 | 30,242 | 47  | 132 | 3  | 2.3 | 1.3 | 6872 51616 54457                                        | TAF1 TAF9B TAF7L                                           | 0                                             | MyList |        |
| KEGG Pathway            | 24 | hsa03022      | Basal transcription factors                                      | -2.9  | 14  | 6.1 | 30,242 | 48  | 132 | 3  | 2.3 | 1.3 | 6872 51616 54457                                        | TAF1 TAF9B TAF7L                                           | 0                                             | MyList |        |
| Reactome Gene Sets      | 6  | R-HSA-9716542 | Signaling by Rho GTPases, Miro GTPases and RHOBTB3               | -2.9  | 3.2 | 3.9 | 30,242 | 723 | 132 | 10 | 7.6 | 2.3 | 367 395 537 2010 2316 4810 7454 9754 23229 139818       | AR ARHGAP6 ATP6AP1 EMD FLNA INH1 WAS STARD8 ARHGEF9 DOCK11 | 0                                             | MyList |        |
| GO Biological Processes | 19 | GO:0043433    | negative regulation of DNA-binding transcription factor activity | -2.9  | 6.2 | 4.7 | 30,242 | 185 | 132 | 5  | 3.8 | 1.7 | 19_GO:0050789 regulation of biological process          | 2316 3654 6872 28952 440275                                | FLNA IRAK1 TAF1 CDC22 EIF2AK4                 | 0      | MyList |
| Reactome Gene Sets      | 6  | R-HSA-1793185 | Chondroitin sulfate/dermatan sulfate metabolism                  | --2.9 | 14  | 6   | 30,242 | 50  | 132 | 3  | 2.3 | 1.3 | 2719 3423 56548                                         | GPC3 IDS CHST7                                             | 0                                             | MyList |        |
| GO Biological Processes | 19 | GO:0071478    | cellular response to radiation                                   | -2.9  | 6.1 | 4.7 | 30,242 | 187 | 132 | 5  | 3.8 | 1.7 | 19_GO:0050896 response to stimulus                      | 2002 2332 6011 6872 440275                                 | ELK1 FMR1 GRK1 TAF1 EIF2AK4                   | 0      | MyList |
| GO Biological Processes | 19 | GO:0009896    | positive regulation of catabolic process                         | -2.8  | 3.7 | 4   | 30,242 | 493 | 132 | 8  | 6.1 | 2.1 | 19_GO:0048518 positive regulation of biological process | 292 2332 2719 6872 8517 10075 11040 28952                  | SLC25A5 FMR1 GPC3 TAF1 IKBK HUWE1 PIM2 CCDC22 | 0      | MyList |
| GO Biological Processes | 19 | GO:0007249    | I-kappaB kinase/NF-kappaB signaling                              | -2.8  | 4.9 | 4.3 | 30,242 | 281 | 132 | 6  | 4.5 | 1.8 | 19_GO:0023052 signaling                                 | 2316 3654 7105 8517 11040 28952                            | FLNA IRAK1 TSPAN6 IKBK PIM2 CCDC22            | 0      | MyList |
| GO Biological Processes | 19 | GO:2000300    | regulation of synaptic vesicle exocytosis                        | -2.8  | 13  | 5.7 | 30,242 | 54  | 132 | 3  | 2.3 | 1.3 | 19_GO:0051179 localization                              | 2332 6853 6855                                             | FMR1 SYN1 SYP                                 | 0      | MyList |
| Reactome Gene Sets      | 6  | R-HSA-1638091 | Heparan sulfate/heparin (HS-GAG) metabolism                      | -2.7  | 12  | 5.7 | 30,242 | 55  | 132 | 3  | 2.3 | 1.3 | 2719 3423 90161                                         | GPC3 IDS HS6ST2                                            | 0                                             | MyList |        |
| GO Biological Processes | 19 | GO:0006360    | transcription by RNA polymerase I                                | -2.7  | 12  | 5.7 | 30,242 | 55  | 132 | 3  | 2.3 | 1.3 | 19_GO:0008152 metabolic process                         | 2316 6872 23133                                            | FLNA TAF1 PHF8                                | 0      | MyList |
| Reactome Gene Sets      | 6  | R-HSA-71387   | Metabolism of carbohydrates                                      | -2.7  | 4.7 | 4.2 | 30,242 | 295 | 132 | 6  | 4.5 | 1.8 | 2539 2719 3423 5230 56548 90161                         | G6PD GPC3 IDS PGK1 CHST7 HS6ST2                            | 0                                             | MyList |        |

|                               |    |               |                                                                 |                                                                     |      |     |     |        |     |     |   |     |     |                                                       |                                                                  |   |        |
|-------------------------------|----|---------------|-----------------------------------------------------------------|---------------------------------------------------------------------|------|-----|-----|--------|-----|-----|---|-----|-----|-------------------------------------------------------|------------------------------------------------------------------|---|--------|
| GO<br>Biological<br>Processes | 19 | GO:0010257    | NADH<br>dehydrogenase<br>complex assembly                       | 19_GO:0009987<br>cellular process                                   | -2.7 | 12  | 5.5 | 30,242 | 57  | 132 | 3 | 2.3 | 1.3 | 4694 6901 54539                                       | NDUFA1 TFAFAZZIN <br>NDUFB11                                     | 0 | MyList |
| GO<br>Biological<br>Processes | 19 | GO:0032981    | mitochondrial<br>respiratory chain<br>complex I assembly        | 19_GO:0009987<br>cellular process                                   | -2.7 | 12  | 5.5 | 30,242 | 57  | 132 | 3 | 2.3 | 1.3 | 4694 6901 54539                                       | NDUFA1 TFAFAZZIN <br>NDUFB11                                     | 0 | MyList |
| GO<br>Biological<br>Processes | 19 | GO:0071482    | cellular response to<br>light stimulus                          | 19_GO:0050896<br>response to<br>stimulus                            | -2.7 | 7.4 | 4.7 | 30,242 | 124 | 132 | 4 | 3   | 1.5 | 2332 6011 6872 <br>440275                             | FMR1 GRK1 TAF1 EI<br>F2AK4                                       | 0 | MyList |
| Reactome<br>Gene Sets         | 6  | R-HSA-1630316 | Glycosaminoglycan<br>metabolism                                 |                                                                     | -2.7 | 7.4 | 4.7 | 30,242 | 124 | 132 | 4 | 3   | 1.5 | 2719 3423 56548<br>190161                             | GPC3 IDS CHST7 HS<br>6ST2                                        | 0 | MyList |
| GO<br>Biological<br>Processes | 19 | GO:0050808    | synapse<br>organization                                         | 19_GO:0009987<br>cellular process                                   | -2.6 | 3.8 | 3.8 | 30,242 | 426 | 132 | 7 | 5.3 | 2   | 1741 2316 6853 <br>8321 10013 8082<br>3 139065        | DLG3 FLNA SYN1 F<br>ZD1 HDAC6 BHLHB9<br> SLITRK4                 | 0 | MyList |
| Reactome<br>Gene Sets         | 6  | R-HSA-1268020 | Mitochondrial<br>protein import                                 |                                                                     | -2.6 | 11  | 5.2 | 30,242 | 64  | 132 | 3 | 2.3 | 1.3 | 1678 6901 10245                                       | TIMM8A TFAFAZZIN <br>TIMM17B                                     | 0 | MyList |
| Canonical<br>Pathways         | 11 | M34           | PID TCR<br>PATHWAY                                              |                                                                     | -2.6 | 11  | 5.2 | 30,242 | 64  | 132 | 3 | 2.3 | 1.3 | 2316 7454 8517                                        | FLNA WAS IKBKG                                                   | 0 | MyList |
| Reactome<br>Gene Sets         | 6  | R-HSA-450294  | MAP kinase<br>activation                                        |                                                                     | -2.6 | 11  | 5.2 | 30,242 | 64  | 132 | 3 | 2.3 | 1.3 | 2002 3654 8517                                        | ELK1 IRAK1 IKBKG                                                 | 0 | MyList |
| GO<br>Biological<br>Processes | 19 | GO:0009416    | response to light<br>stimulus                                   | 19_GO:0050896<br>response to<br>stimulus                            | -2.5 | 4.3 | 3.9 | 30,242 | 321 | 132 | 6 | 4.5 | 1.8 | 778 2002 2332 6<br>011 6872 440275                    | CACNA1F ELK1 FMR<br>1 GRK1 TAF1 EIF2AK<br>4                      | 0 | MyList |
| Reactome<br>Gene Sets         | 6  | R-HSA-162599  | Late Phase of HIV<br>Life Cycle                                 |                                                                     | -2.5 | 6.6 | 4.4 | 30,242 | 139 | 132 | 4 | 3   | 1.5 | 6872 51616 5445<br>7 89853                            | TAF1 TAF9B TAF7L <br>MVB12B                                      | 0 | MyList |
| Canonical<br>Pathways         | 11 | M153          | PID P75 NTR<br>PATHWAY                                          |                                                                     | -2.5 | 10  | 5   | 30,242 | 68  | 132 | 3 | 2.3 | 1.3 | 3654 8517 55859                                       | IRAK1 IKBKG BEX1                                                 | 0 | MyList |
| GO<br>Biological<br>Processes | 19 | GO:0051129    | negative regulation<br>of cellular<br>component<br>organization | 19_GO:0048519<br>negative<br>regulation of<br>biological<br>process | -2.5 | 3   | 3.5 | 30,242 | 691 | 132 | 9 | 6.8 | 2.2 | 292 367 395 231<br>6 7454 10013 10<br>075 23133 58526 | SLC25A5 AR ARHGA<br>P6 FLNA WAS HDA<br>C6 HUWE1 PHF8 MI<br>D1IP1 | 0 | MyList |
| GO<br>Biological<br>Processes | 19 | GO:0016241    | regulation of<br>macroautophagy                                 | 19_GO:0050789<br>regulation of<br>biological<br>process             | -2.5 | 6.5 | 4.3 | 30,242 | 141 | 132 | 4 | 3   | 1.5 | 292 4943 8517 1<br>0013                               | SLC25A5 TBC1D25 IK<br>BKG HDAC6                                  | 0 | MyList |
| GO<br>Biological<br>Processes | 19 | GO:0071214    | cellular response to<br>abiotic stimulus                        | 19_GO:0050896<br>response to<br>stimulus                            | -2.5 | 4.1 | 3.8 | 30,242 | 333 | 132 | 6 | 4.5 | 1.8 | 2002 2332 6011 <br>6872 65267 4402<br>75              | ELK1 FMR1 GRK1 T<br>AF1 WNK3 EIF2AK4                             | 0 | MyList |
| GO<br>Biological<br>Processes | 19 | GO:0104004    | cellular response to<br>environmental<br>stimulus               | 19_GO:0050896<br>response to<br>stimulus                            | -2.5 | 4.1 | 3.8 | 30,242 | 333 | 132 | 6 | 4.5 | 1.8 | 2002 2332 6011 <br>6872 65267 4402<br>75              | ELK1 FMR1 GRK1 T<br>AF1 WNK3 EIF2AK4                             | 0 | MyList |

|                         |    |               |                                                     |                                                            |      |     |     |        |     |     |   |     |     |                                                    |                                                    |   |        |
|-------------------------|----|---------------|-----------------------------------------------------|------------------------------------------------------------|------|-----|-----|--------|-----|-----|---|-----|-----|----------------------------------------------------|----------------------------------------------------|---|--------|
| GO Biological Processes | 19 | GO:0045732    | positive regulation of protein catabolic process    | 19_GO:0048518<br>positive regulation of biological process | -2.4 | 4.9 | 4   | 30,242 | 232 | 132 | 5 | 3.8 | 1.7 | 2332 2719 6872 10075 28952                         | FMR1 GPC3 TAF1 HWE1 CCDC22                         | 0 | MyList |
| GO Biological Processes | 19 | GO:0022411    | cellular component disassembly                      | 19_GO:0009987<br>cellular process                          | -2.4 | 3.6 | 3.6 | 30,242 | 448 | 132 | 7 | 5.3 | 2   | 292 4943 6901 10013 10075 11152 58526              | SLC25A5 TBC1D25 TFAFAZZIN HDAC6 HWE1 WDR45 MID1IP1 | 0 | MyList |
| Reactome Gene Sets      | 6  | R-HSA-162906  | HIV Infection                                       |                                                            | -2.4 | 4.9 | 4   | 30,242 | 234 | 132 | 5 | 3.8 | 1.7 | 292 6872 51616 54457 89853                         | SLC25A5 TAF1 TAF9B TAF7L MVB12B                    | 0 | MyList |
| Reactome Gene Sets      | 6  | R-HSA-448424  | Interleukin-17 signaling                            |                                                            | -2.4 | 9.5 | 4.8 | 30,242 | 72  | 132 | 3 | 2.3 | 1.3 | 2002 3654 8517                                     | ELK1 IRAK1 IKBKG                                   | 0 | MyList |
| Reactome Gene Sets      | 6  | R-HSA-167172  | Transcription of the HIV genome                     |                                                            | -2.4 | 9.4 | 4.8 | 30,242 | 73  | 132 | 3 | 2.3 | 1.3 | 6872 51616 54457                                   | TAF1 TAF9B TAF7L                                   | 0 | MyList |
| GO Biological Processes | 19 | GO:0010639    | negative regulation of organelle organization       | 19_GO:0048519<br>negative regulation of biological process | -2.4 | 4   | 3.7 | 30,242 | 348 | 132 | 6 | 4.5 | 1.8 | 292 395 7454 10013 10075 58526                     | SLC25A5 ARHGAP6 WAS HDAC6 HWE1 MID1IP1             | 0 | MyList |
| Reactome Gene Sets      | 6  | R-HSA-162587  | HIV Life Cycle                                      |                                                            | -2.3 | 6   | 4.1 | 30,242 | 152 | 132 | 4 | 3   | 1.5 | 6872 51616 54457 89853                             | TAF1 TAF9B TAF7L MVB12B                            | 0 | MyList |
| GO Biological Processes | 19 | GO:0031346    | positive regulation of cell projection organization | 19_GO:0048518<br>positive regulation of biological process | -2.3 | 3.9 | 3.6 | 30,242 | 353 | 132 | 6 | 4.5 | 1.8 | 2316 2332 8321 9696 80823 139818                   | FLNA FMR1 FZD1 CROCC BHLHB9 DOCK11                 | 0 | MyList |
| WikiPath ways           | 27 | WP4666        | Hepatitis B infection                               |                                                            | -2.3 | 6   | 4.1 | 30,242 | 154 | 132 | 4 | 3   | 1.5 | 537 2002 3654 8517                                 | ATP6AP1 ELK1 IRAK1 IKBKG                           | 0 | MyList |
| Reactome Gene Sets      | 6  | R-HSA-9013148 | CDC42 GTPase cycle                                  |                                                            | -2.3 | 5.9 | 4.1 | 30,242 | 155 | 132 | 4 | 3   | 1.5 | 7454 9754 23229 139818                             | WAS STARD8 ARHGAP9 DOCK11                          | 0 | MyList |
| KEGG Pathway            | 24 | hsa05230      | Central carbon metabolism in cancer                 |                                                            | -2.3 | 8.8 | 4.6 | 30,242 | 78  | 132 | 3 | 2.3 | 1.3 | 2539 8266 29911                                    | G6PD UBL4A HOOK2                                   | 0 | MyList |
| GO Biological Processes | 19 | GO:0051494    | negative regulation of cytoskeleton organization    | 19_GO:0048519<br>negative regulation of biological process | -2.2 | 5.6 | 3.9 | 30,242 | 163 | 132 | 4 | 3   | 1.5 | 395 7454 10013 58526                               | ARHGAP6 WAS HDAC6 MID1IP1                          | 0 | MyList |
| GO Biological Processes | 19 | GO:0007420    | brain development                                   | 19_GO:0032502<br>developmental process                     | -2.2 | 2.7 | 3.2 | 30,242 | 753 | 132 | 9 | 6.8 | 2.2 | 2316 2334 2539 6872 8321 23133 57526 139411 170302 | FLNA AFF2 G6PD TAF1 FZD1 PHF8 PCDH19 PTCHD1 ARX    | 0 | MyList |

|                         |    |               |                                                                              |      |     |     |        |     |     |   |     |     |                                          |                                            |   |        |
|-------------------------|----|---------------|------------------------------------------------------------------------------|------|-----|-----|--------|-----|-----|---|-----|-----|------------------------------------------|--------------------------------------------|---|--------|
| Reactome Gene Sets      | 6  | R-HSA-674695  | RNA Polymerase II Pre-transcription Events                                   | -2.2 | 8.2 | 4.4 | 30,242 | 84  | 132 | 3 | 2.3 | 1.3 | 6872 51616 54457                         | TAF1 TAF9B TAF7L                           | 0 | MyList |
| Reactome Gene Sets      | 6  | R-HSA-168142  | Toll Like Receptor 10 (TLR10) Cascade                                        | -2.2 | 8.1 | 4.3 | 30,242 | 85  | 132 | 3 | 2.3 | 1.3 | 2002 3654 8517                           | ELK1 IRAK1 IKBKG                           | 0 | MyList |
| Reactome Gene Sets      | 6  | R-HSA-975871  | MyD88 cascade initiated on plasma membrane                                   | -2.2 | 8.1 | 4.3 | 30,242 | 85  | 132 | 3 | 2.3 | 1.3 | 2002 3654 8517                           | ELK1 IRAK1 IKBKG                           | 0 | MyList |
| Reactome Gene Sets      | 6  | R-HSA-168176  | Toll Like Receptor 5 (TLR5) Cascade                                          | -2.2 | 8.1 | 4.3 | 30,242 | 85  | 132 | 3 | 2.3 | 1.3 | 2002 3654 8517                           | ELK1 IRAK1 IKBKG                           | 0 | MyList |
| GO Biological Processes | 19 | GO:1902904    | negative regulation of supramolecular fiber organization                     | -2.2 | 5.5 | 3.9 | 30,242 | 167 | 132 | 4 | 3   | 1.5 | 395 7454 10013 58526                     | ARHGAP6 WAS HDAC6 MID1 IP1                 | 0 | MyList |
| GO Biological Processes | 19 | GO:0046928    | regulation of neurotransmitter secretion                                     | -2.2 | 8   | 4.3 | 30,242 | 86  | 132 | 3 | 2.3 | 1.3 | 2332 6853 6855                           | FMR1 SYN1 SYP                              | 0 | MyList |
| GO Biological Processes | 19 | GO:0030901    | midbrain development                                                         | -2.1 | 7.6 | 4.2 | 30,242 | 90  | 132 | 3 | 2.3 | 1.3 | 2539 6872 8321                           | G6PD TAF1 FZD1                             | 0 | MyList |
| Reactome Gene Sets      | 6  | R-HSA-975138  | TRAF6 mediated induction of NFkB and MAP kinases upon TLR7/8 or 9 activation | -2.1 | 7.6 | 4.1 | 30,242 | 91  | 132 | 3 | 2.3 | 1.3 | 2002 3654 8517                           | ELK1 IRAK1 IKBKG                           | 0 | MyList |
| GO Biological Processes | 19 | GO:0034644    | cellular response to UV                                                      | -2.1 | 7.6 | 4.1 | 30,242 | 91  | 132 | 3 | 2.3 | 1.3 | 2332 6872 440275                         | FMR1 TAF1 EIF2AK4                          | 0 | MyList |
| GO Biological Processes | 19 | GO:0042176    | regulation of protein catabolic process                                      | -2.1 | 3.5 | 3.3 | 30,242 | 391 | 132 | 6 | 4.5 | 1.8 | 2316 2332 2719 6872 10075 28952          | FLNA FMR1 GPC3 TAF1 HUWE1 CCDC22           | 0 | MyList |
| KEGG Pathway            | 24 | hsa05161      | Hepatitis B                                                                  | -2.1 | 5.2 | 3.7 | 30,242 | 177 | 132 | 4 | 3   | 1.5 | 537 2002 3654 8517                       | ATP6AP1 ELK1 IRAK1 IKBKG                   | 0 | MyList |
| Reactome Gene Sets      | 6  | R-HSA-975155  | MyD88 dependent cascade initiated on endosome                                | -2.1 | 7.5 | 4.1 | 30,242 | 92  | 132 | 3 | 2.3 | 1.3 | 2002 3654 8517                           | ELK1 IRAK1 IKBKG                           | 0 | MyList |
| Reactome Gene Sets      | 6  | R-HSA-6804756 | Regulation of TP53 Activity through Phosphorylation                          | -2.1 | 7.5 | 4.1 | 30,242 | 92  | 132 | 3 | 2.3 | 1.3 | 6872 51616 54457                         | TAF1 TAF9B TAF7L                           | 0 | MyList |
| GO Biological Processes | 19 | GO:0051668    | localization within membrane                                                 | -2.1 | 2.8 | 3.1 | 30,242 | 651 | 132 | 8 | 6.1 | 2.1 | 367 1678 1741 2316 2719 8266 28952 65267 | AR TIMM8A DLG3 FBLN4 GPC3 UBL4A CDC22 WNK3 | 0 | MyList |

|                         |    |               |                                                      |                                                         |      |     |     |        |     |     |   |     |     |                                                    |                                                 |   |        |
|-------------------------|----|---------------|------------------------------------------------------|---------------------------------------------------------|------|-----|-----|--------|-----|-----|---|-----|-----|----------------------------------------------------|-------------------------------------------------|---|--------|
| Reactome Gene Sets      | 6  | R-HSA-168181  | Toll Like Receptor 7/8 (TLR7/8) Cascade              |                                                         | -2.1 | 7.4 | 4.1 | 30,242 | 93  | 132 | 3 | 2.3 | 1.3 | 2002 3654 8517                                     | ELK1 IRAK1 IKBK                                 | 0 | MyList |
| GO Biological Processes | 19 | GO:0033108    | mitochondrial respiratory chain complex assembly     | 19_GO:0009987 cellular process                          | -2.1 | 7.4 | 4.1 | 30,242 | 93  | 132 | 3 | 2.3 | 1.3 | 4694 6901 54539                                    | NDUFA1 TAFAZZIN NDUFB11                         | 0 | MyList |
| GO Biological Processes | 19 | GO:0044089    | positive regulation of cellular component biogenesis | 19_GO:0048518 positive regulation of biological process | -2.1 | 3.1 | 3.2 | 30,242 | 520 | 132 | 7 | 5.3 | 2   | 2316 2332 7454 9696 80823 139065 139818            | FLNA FMR1 WAS CR OCC BHLHB9 SLITR K4 DOCK11     | 0 | MyList |
| GO Biological Processes | 19 | GO:0019693    | ribose phosphate metabolic process                   | 19_GO:0008152 metabolic process                         | -2.1 | 3.5 | 3.3 | 30,242 | 397 | 132 | 6 | 4.5 | 1.8 | 204 2539 5230 6901 55190 170685                    | AK2 G6PD PGK1 TAFAZZIN NUDT11 NUDT10            | 0 | MyList |
| Reactome Gene Sets      | 6  | R-HSA-168164  | Toll Like Receptor 3 (TLR3) Cascade                  |                                                         | -2.1 | 7.3 | 4.1 | 30,242 | 94  | 132 | 3 | 2.3 | 1.3 | 2002 3654 8517                                     | ELK1 IRAK1 IKBK                                 | 0 | MyList |
| Reactome Gene Sets      | 6  | R-HSA-9013423 | RAC3 GTPase cycle                                    |                                                         | -2.1 | 7.3 | 4.1 | 30,242 | 94  | 132 | 3 | 2.3 | 1.3 | 395 2010 4810                                      | ARHGAP6 EMD NHS                                 | 0 | MyList |
| GO Biological Processes | 19 | GO:0060322    | head development                                     | 19_GO:0032502 developmental process                     | -2.1 | 2.6 | 3   | 30,242 | 796 | 132 | 9 | 6.8 | 2.2 | 2316 2334 2539 6872 8321 23133 57526 139411 170302 | FLNA AFF2 G6PD TAF1 FZD1 PHF8 PCDH19 PTCHD1 ARX | 0 | MyList |
| GO Biological Processes | 19 | GO:1903827    | regulation of cellular protein localization          | 19_GO:0051179 localization                              | -2.1 | 3   | 3.1 | 30,242 | 527 | 132 | 7 | 5.3 | 2   | 367 2010 2316 2719 9696 10075 65267                | AR EMD FLNA GPC3 CROCC HUWE1 WINK3              | 0 | MyList |
| Reactome Gene Sets      | 6  | R-HSA-168138  | Toll Like Receptor 9 (TLR9) Cascade                  |                                                         | -2.1 | 7.2 | 4   | 30,242 | 96  | 132 | 3 | 2.3 | 1.3 | 2002 3654 8517                                     | ELK1 IRAK1 IKBK                                 | 0 | MyList |
| Reactome Gene Sets      | 6  | R-HSA-9013149 | RAC1 GTPase cycle                                    |                                                         | -2   | 5   | 3.6 | 30,242 | 185 | 132 | 4 | 3   | 1.5 | 2010 4810 7454 139818                              | EMD NHS WAS DOCK11                              | 0 | MyList |
| Reactome Gene Sets      | 6  | R-HSA-166166  | MyD88-independent TLR4 cascade                       |                                                         | -2   | 6.9 | 3.9 | 30,242 | 99  | 132 | 3 | 2.3 | 1.3 | 2002 3654 8517                                     | ELK1 IRAK1 IKBK                                 | 0 | MyList |
| Reactome Gene Sets      | 6  | R-HSA-937061  | TRIF(TICAM1)-mediated TLR4 signaling                 |                                                         | -2   | 6.9 | 3.9 | 30,242 | 99  | 132 | 3 | 2.3 | 1.3 | 2002 3654 8517                                     | ELK1 IRAK1 IKBK                                 | 0 | MyList |
| GO Biological Processes | 19 | GO:0060996    | dendritic spine development                          | 19_GO:0032502 developmental process                     | -2   | 6.9 | 3.9 | 30,242 | 99  | 132 | 3 | 2.3 | 1.3 | 2332 10013 80823                                   | FMR1 HDAC6 BHLHB9                               | 0 | MyList |
| GO Biological Processes | 19 | GO:0051588    | regulation of neurotransmitter transport             | 19_GO:0051179 localization                              | -2   | 6.9 | 3.9 | 30,242 | 100 | 132 | 3 | 2.3 | 1.3 | 2332 6853 6855                                     | FMR1 SYN1 SYP                                   | 0 | MyList |

|                               |    |               |                                                       |                                                   |    |     |     |        |     |     |   |     |     |                                |                                  |   |        |
|-------------------------------|----|---------------|-------------------------------------------------------|---------------------------------------------------|----|-----|-----|--------|-----|-----|---|-----|-----|--------------------------------|----------------------------------|---|--------|
| GO<br>Biological<br>Processes | 19 | GO:0006626    | protein targeting to mitochondrion                    | 19_GO:0051179<br>localization                     | -2 | 6.9 | 3.9 | 30,242 | 100 | 132 | 3 | 2.3 | 1.3 | 1678 10,075 10245              | TIMM8A HUWE1 TIMM17B             | 0 | MyList |
| GO<br>Biological<br>Processes | 19 | GO:0050890    | cognition                                             | 19_GO:0032501<br>multicellular organismal process | -2 | 3.9 | 3.3 | 30,242 | 296 | 132 | 5 | 3.8 | 1.7 | 2334 80823 84061 139411 440275 | AFF2 BHLHB9 MAGT1 PTCHD1 EIF2AK4 | 0 | MyList |
| Reactome<br>Gene Sets         | 6  | R-HSA-9633012 | Response of EIF2AK4 (GCN2) to amino acid deficiency   |                                                   | -2 | 6.8 | 3.9 | 30,242 | 101 | 132 | 3 | 2.3 | 1.3 | 6134 6173 44,0275              | RPL10 RPL36A EIF2AK4             | 0 | MyList |
| Reactome<br>Gene Sets         | 6  | R-HSA-168188  | Toll Like Receptor TLR6:TLR2 Cascade                  |                                                   | -2 | 6.8 | 3.9 | 30,242 | 101 | 132 | 3 | 2.3 | 1.3 | 2002 3654 8517                 | ELK1 IRAK1 IKBKG                 | 0 | MyList |
| Reactome<br>Gene Sets         | 6  | R-HSA-166058  | MyD88:MAL(TIRAP) cascade initiated on plasma membrane |                                                   | -2 | 6.8 | 3.9 | 30,242 | 101 | 132 | 3 | 2.3 | 1.3 | 2002 3654 8517                 | ELK1 IRAK1 IKBKG                 | 0 | MyList |
| GO<br>Biological<br>Processes | 19 | GO:0050821    | protein stabilization                                 | 19_GO:0065007<br>biological regulation            | -2 | 4.8 | 3.5 | 30,242 | 191 | 132 | 4 | 3   | 1.5 | 2316 6872 11040 51616          | FLNA TAF1 PIM2 TAF9B             | 0 | MyList |



**Table S4.** Candidate genes of X0\_Hypomethylated which were also detected as hypomethylated in TSvs46XX in previous research.

| PNAS2020      | CLINEPI2015 | X0hypo        | PNAS2020 CLINEPI2015 | PNAS2020 X0hypo | CLINEPI2015 X0hypo | PNAS2020 CLINEPI2015 X0hypo |
|---------------|-------------|---------------|----------------------|-----------------|--------------------|-----------------------------|
| RP11-1148L6.9 | 38961       | MVB12B        | 5                    | NUDT10          | CYP2E1             | WDR45                       |
| PFKFB1        | 40057       | RP4-537K23.4  | FTSJ1                | TAF9B           | HOXA4              | CXorf40B                    |
| XX-           | TLE1        | AF196779.12   | EFNB1                | TIMM17B         | EMD                | NDUFA1                      |
| FW83563B9.5   | MGC3207     | ZNF630        | IGBP1                | ZNF674-AS1      | CXorf40A           | NDUFB11                     |
| SNORA70       | FAM83A      | RP11-85L21.4  | APEX2                | FAM127B         | SYN                | ESX1                        |
| AL049564.1    | GLUD1       | IKBKG         | CSTF2                | RP4-769N13.6    | OTUD5              | IDS                         |
| LINC00894     | CST9L       | BTBD11        | RNF113A              | TRMT2B          | UBL4A              | CHST7                       |
| AIFM1         | CCL26       | TM4SF2        | PQBP1                | PCDH19          | WNK3               | PIM2                        |
| AF196970.3    | NPR2        | EIF2AK4       | LDOC1                | RAI2            | ZMYM3              | C1GALT1C1                   |
| FAM127A       | HLA-DQB2    | CACNA1F       | RBM10                | NKAPP1          | AFF2               | TAF1                        |
| SLC25A53      | SEC31L2     | GPR50-AS1     | SLC25A14             | RPL36A-HNRNPH2  | ARHGEF9            | SYN1                        |
| ERCC6L        | SH3BP2      | TRMT2B-AS1    | NKAP                 | F8              | MOSPD1             | ELK1                        |
| FAM104B       | LYPD3       | AC115618.1    | ATG4A                | TMEM255A        | BCORL1             | G6PD                        |
| HNRNPH2       | ZNF593      | HAUS7         | PSMD10               | NUDT11          | RBMX2              | LONRF3                      |
| OGT           | NAV1        | CROCC         | DKC1                 | VMA21           | NHS                | RPL36A                      |
| FANCB         | HP          | U1            | DACH2                | RP11-66N11.8    | PNCK               | MAGT1                       |
| ZNF674        | DHODH       | LINC00086     | SOX3                 | HUWE1           | PGK1               | KLF8                        |
| OOEP          | AIF1        | TAF7L         | YIPF6                | HS6ST2          | TSPAN7             | CCDC22                      |
| RLIM          | STMN1       | SAMD11        | PRAF2                | RP3-326L13.2    | TAZ                | ARHGAP6                     |
| DPPA5         | CIA51       | DOCK11        | GPR101               | MORC4           |                    | WAS                         |
| ZNF81         | ZFYVE19     | HOOK2         | GLA                  | TBC1D25         |                    | MAGEE1                      |
| AL022578.1    | GPR109B     | TNS1          | UTP14A               | LINC00629       |                    | HDAC6                       |
| RP11-308D16.2 | FYB         | MPL           | MOSPD2               | KIAA2022        |                    | TIMM8A                      |
| GPKOW         | VAMP5       | FOXI2         | DDX43                |                 | TMEM185A           | FLNA                        |
| RP13-228J13.9 | PDZD11      | HOXA3         | TFE3                 |                 | AC093609.1         | BHLHB9                      |
| RP11-348F1.2  | TACSTD1     | HOXA-AS2      | ARMCX5               | BEX4            |                    | SCML1                       |
| RP11-348F1.3  | GPR109A     | RP1-170O19.22 | RPL39                | MAGIX           |                    | ZBTB33                      |
| SPACA5        | HTRA4       | SPRN          | KIF4A                | PRRG1           |                    | EBP                         |
| ZNF182        | AMT         | NAPRT1        | ATRX                 | PTCHD1          |                    | SRPX                        |
| THOC2         | P2RY2       | CTU1          | TSPYL2               |                 | SLC25A5-AS1        | ZNF41                       |
| CLCN5         | VENTX       |               | MID2                 |                 | RP4-769N13.7       | HMGB3                       |
| STK26         | FLJ30046    |               | ZCCHC12              | SRPK3           |                    | IRAK1                       |
| TAB3-AS2      | F12         |               | NR0B1                |                 |                    | IL13RA1                     |
| SMIM10        | STK31       |               | ZNF449               |                 |                    | LANCL3                      |
| KRBOX4        | ZNF541      |               | OPHN1                |                 |                    | AR                          |
| ZNF75D        | C14orf162   |               | SLC35A2              |                 |                    | DLG3                        |
| PIH1D3        | TRPM2       |               | MAGEH1               |                 |                    | DNASE1L1                    |
| NUP62CL       | DEFA1       |               | IDH3G                |                 |                    | PHF8                        |
| AL590410.1    | EPN3        |               | RBMX                 |                 |                    | RAB33A                      |
| BTB           | CCIN        |               | PIGA                 |                 |                    | SLC25A5                     |
| MAMLD1        | MAN2A2      |               | COX7B                |                 |                    | ELF4                        |
| FAM127C       | LMO2        |               | ARMCX3               |                 |                    | WDR13                       |
| SNORD61       | CLEC4C      |               | FUNDC2               |                 |                    | MAGED2                      |
| SMIM10L2B     | EPAS1       |               | RAB39B               |                 |                    | MID1IP1                     |
| AC234775.1    | ARS2        |               | NSDHL                |                 |                    | RPL10                       |
| ARMCX3-AS1    | BRD4        |               | CETN2                |                 |                    | STARD8                      |
| ZCCHC18       | C6orf68     |               | NKRF                 |                 |                    | FMR1                        |
| NCL           | DYRK4       |               | WDR44                |                 |                    | ATP6AP1                     |
| HSPB1P2       | HPS4        |               | SUV39H1              |                 |                    | BEX1                        |
| H3F3AP1       | TMEM102     |               | ZDHHC15              |                 |                    |                             |
| RP1-161N10.1  | LTBR        |               | LAS1L                |                 |                    |                             |
| SMAD5-AS1_2   | POR         |               | MSN                  |                 |                    |                             |
| RHOXF1P1      | ZNF124      |               | FHL1                 |                 |                    |                             |
| CXorf57       | RABGEF1     |               | ACSL4                |                 |                    |                             |
| ZNF280C       | AMDHD1      |               | ARAF                 |                 |                    |                             |
| CELSR3-AS1    | PPP4R2      |               | MCTS1                |                 |                    |                             |
| OVCH1-AS1     | HMGNI       |               | HDAC8                |                 |                    |                             |
| AMER1         | CIDEB       |               | CXorf56              |                 |                    |                             |
| DGKK          | NFE2        |               | PRDX4                |                 |                    |                             |

|               |           |          |
|---------------|-----------|----------|
| RAC1P4        | NR1I2     | ABCB7    |
| ARHGAP36      | SFTPD     | SLITRK4  |
| LINC01201     | HSPA2     | KLHL34   |
| GPRASP1       | BRCA2     | RRAGB    |
| RP11-314A15.2 | HAL       | XKRX     |
| FAM122B       | SLC22A3   | XK       |
| FGF13-AS1     | FBXL5     | MECP2    |
| AC131011.1    | ITGB1BP1  | PGRMC1   |
| MBNL3         | RPS6KC1   | IL1RAPL2 |
| HDX           | ENTPD1    | FAM58A   |
| PBDC1         | ARID3A    | PHKA1    |
| APOOL         | APOB      | CNKSR2   |
| TSR2          | P2RY13    | MBTPS2   |
| RP1-274L7.1   | LPO       | PCSK1N   |
| RP6-24A23.3   | BTBD6     | HTATSF1  |
| MYCLP1        | SERPINF1  | FAM122C  |
| TSPAN6        | ZNF266    | NONO     |
| RP3-389A20.5  | CTBP1     | FGD1     |
| LAGE3         | BIRC4BP   | RAP2C    |
| SAT1          | KLF1      | POU3F4   |
| RP13-314C10.5 | RAB8A     | SNX12    |
| FAM156A       | CD244     | SH3BGR1  |
| ZC4H2         | HSPC159   | SMS      |
| HMGN5         | TIGD5     | FAM50A   |
| KANTR         | LGP1      | UPF3B    |
| RP11-236P24.3 | IL27      | INGX     |
| PRICKLE3      | CACYBP    | CHM      |
| NXT2          | CTSG      | SYTL4    |
| MORF4L2-AS1   | RPS6KA1   | PIN4     |
| LINC00893     | FLJ25084  | ATP6AP2  |
| RP1-137H15.2  | IFITM3    | ARX      |
| PCYT1B-AS1    | SCMH1     | UXT      |
| LINC01285     | GPR21     | PHKA2    |
| SMIM10L2A     | AQP9      | GNL3L    |
| WDR53         | LYAR      | MTM1     |
| ZXDB          | PRTN3     | GABRQ    |
| AL158069.1    | FLJ40919  | MTMR8    |
| FAM155B       | GSG1      | TMLHE    |
| Y_RNA         | LYZ       | AMOT     |
| snoU13        | H2BFS     | NAP1L2   |
| MID1IP1-AS1   | SEPT10    | ZIC3     |
| CENPI         | ELA2      | SLITRK2  |
| LINC01381     | UNQ830    | GPC4     |
| UXT-AS1       | CEACAM6   | MAGEE2   |
| TLE1P1        | NKG7      | ATP7A    |
| RNU6-800P     | IER2      | UBE2A    |
| RP13-43E11.1  | SPAG4     | PRPS2    |
| AL035088.1    | SGK2      | EDA      |
| LINC01560     | LAIR1     | TCEAL1   |
| RPS26P11      | SLC44A2   | PRPS1    |
| VPS28         | PABPN1    | MTMR1    |
| MSL3          | PARVG     | USP51    |
| ZDHHC9        | ACYP2     | CDX4     |
| MIR718        | CLEC5A    | TCEAL8   |
| RP11-234P3.2  | BTN1A1    | RPGR     |
| RP5-1091N2.9  | KLHDC7B   | GSPT2    |
| C17orf98      | GALNT3    | LAMP2    |
| DDX26B-AS1    | GPR97     | HIST1H3E |
| RP13-210D15.8 | RBM35B    | GLUD2    |
| BTF3P8        | KCNE1     | RP2      |
| RAP2C-AS1     | GATAD2B   | RPS6KA3  |
| CDR1-AS       | C18orf22  | PAK3     |
| BX842568.4    | HIST1H2AJ | TCEAL2   |
| RPS6KA6       | ATP6V1E2  | GPC3     |
| CXorf58       | KCNQ1     | SLC10A3  |
| APOO          | FUT7      | STAG2    |

|               |           |          |
|---------------|-----------|----------|
| MAP3K15       | CYP27B1   | GRIA3    |
| ENOX2         | LOC158160 | TMSB4X   |
| SASH3         | FCGR3B    | MAOA     |
| MIR5003       | P518      | PKD3     |
| KIF13A        | CLEC9A    | TBX22    |
| FCF1P4        | CSF3R     | ARMCX6   |
| PJA1          | KNS2      | HPRT1    |
| RP11-287D1.4  | KIAA0427  | DYNLT3   |
| NRK           | GNS       | SLC9A6   |
| RP5-1000K24.2 | GLRX2     | SLC7A3   |
| CFP           | C6orf105  | SCML2    |
| NCBP2L        | LGALS4    | USP11    |
| FGF13         | CLEC12A   | ARMCX1   |
| DDX26B        | MGC26963  | TMEM47   |
| DUSP9         | CCT6A     | IL1RAPL1 |
| RP13-188A5.1  | GPR84     | ZNF185   |
| CENPVP3       | ZNF696    | ABCD1    |
| BRCC3         | SLPI      | SLC16A2  |
| CMC4          | MGC11257  | UBQLN2   |
| GRIPAP1       | FLJ33860  | PORCN    |
| LINC01278     | TSPAN16   | ARHGAP4  |
| APLN          | H2AFY     | ZXDA     |
| UPRT          | FLJ35773  | PHF6     |
| AL772400.1    | LOC92345  | ERAS     |
| DERL2         | C14orf58  | PLP2     |
| POLA1         | CIZ1      | PDHA1    |
| XIAP          | BRE       | CLCN4    |
| POU5F1        | SLC22A18  |          |
| AC234031.1    | PILRA     |          |
| GPR50         | ECRG4     |          |
| BX842568.1    | LCE3A     |          |
| RP11-641J8.1  | FLJ35530  |          |
| ZNF711        | LRG1      |          |
| AC003001.1    | FKBP11    |          |
| SLC25A43      | SCRL      |          |
| RNF128        | RNF14     |          |
| RP11-521C20.5 | FXYP1     |          |
| SOCS5P4       | LYCAT     |          |
| FOXO4         | SLC45A1   |          |
| AC005041.11   | PNPLA2    |          |
| CTD-2269E23.4 | CSTA      |          |
| RP1-164F3.8   | MYL9      |          |
| TUBGCP3       | HIPK3     |          |
| AL691477.1    | TATDN1    |          |
| TREX2         | IL21R     |          |
| RNU6-894P     | PREX1     |          |
| RP11-21G20.3  | SH3BP5    |          |
| RP1-169K13.3  | ANKMY1    |          |
| KLHL13        | DOPEY2    |          |
| AMMECR1-IT1   | LOC132321 |          |
| RNU6-481P     | VNN3      |          |
| CITED1        | AGXT      |          |
| MIR3202-2     | C15orf5   |          |
| RP5-972B16.2  | MGC41945  |          |
| BX842568.2    | APOA4     |          |
| NHSL2         | CENPH     |          |
| GPR45         | P2RX1     |          |
| GHc-857G6.7   | PIP3-E    |          |
| MIR106A       | SMPD3     |          |
| ZNF157        | TETRA1    |          |
| CHD4          | LRP8      |          |
| WBP5          | C1orf150  |          |
| RP11-68I3.4   | CLTCL1    |          |
| CCDC160       | H1FO      |          |
| CHIC1         | SEC61G    |          |
| MAP2K4P1      | GPR25     |          |

|               |           |
|---------------|-----------|
| RBM41         | HK2       |
| TMEM263       | DEFB1     |
| RP11-412D9.4  | NDUFS2    |
| LINC00630     | ART3      |
| RP4-613B23.1  | CLCA2     |
| LINGO3        | CYP7B1    |
| RP11-149B9.2  | GRB7      |
| SPIN3         | MS4A6A    |
| COL4A5        | DLK1      |
| RP11-62J1.4   | IFNGR2    |
| RP11-548B3.3  | FOLR3     |
| SOWAHD        | FCN1      |
| FZD2          | LCN2      |
| RP11-320G24.1 | XYLB      |
| AF196972.9    | IL19      |
| FMR1-AS1      | URP2      |
| JADE3         | ZNF710    |
| OR11N1P       | RPUSD3    |
| RP1-149M18.4  | THSD3     |
| CFAP47        | FFAR3     |
| FMR1-AS1_2    | KCNQ1DN   |
| RNF5P1        | SPATC1    |
| PRDM9         | EIF2B3    |
| PNMA5         | SYCP1     |
| CH17-340M24.3 | ABTB1     |
| BEX5          | RNASE3    |
| TMSB15A       | PTGFRN    |
| ARHGEF6       | FUT3      |
| OSBPL5        | NOL3      |
| RP5-998H6.2   | SLC26A8   |
| CSNK1G2P1     | USP10     |
| MYCBPAP       | NAGPA     |
| RP11-94C24.6  | TRIM50C   |
|               | CALML4    |
|               | TIGD2     |
|               | SERPINB10 |
|               | C3orf18   |
|               | SPI1      |
|               | GABRR1    |
|               | EPHA2     |
|               | TFAP2E    |
|               | ACPP      |
|               | LEP       |
|               | SLC37A1   |
|               | LOC201164 |
|               | CEBPE     |
|               | GP5       |
|               | PRR3      |
|               | AZU1      |
|               | TRIP13    |
|               | BSN       |
|               | KCNA6     |
|               | SLC22A12  |
|               | K6IRS2    |
|               | C3orf35   |
|               | RAB34     |
|               | TP53I3    |
|               | BCL2      |
|               | TREM2     |
|               | TACSTD2   |
|               | MPO       |
|               | CEP1      |
|               | CSPG5     |
|               | CASP6     |
|               | C19orf24  |

CPM  
PSMD5  
DNAH3  
MST1  
VWCE  
RAC3  
ALOX12  
C7orf29  
VTN  
GNPDA1  
HIVEP3  
LYK5  
1-Mar  
CAMP  
NPFFR2  
CEACAM3  
SLC19A1  
LRPAP1  
SERGEF  
UCK1  
FCGRT  
CBX7  
PC  
STARD6  
C9orf142  
BXDC1  
EMILIN1  
PLCB2  
PPT2  
CD1D  
DYDC1  
LOC339768  
ZNF22  
SLC11A1  
C17orf44  
EGFL7  
DDAH1  
RPL31  
MLX  
PWP1  
RTEL1  
EDG3  
RETN  
C21orf13  
LOC284948  
CD59  
ZFP41  
MLSTD1  
ZPBP2  
CTHRC1  
C20orf135  
EIF4E  
FSD1NL  
ELOVL3  
EPHA3  
PPEF2  
TXNRD2  
S100P  
MRPS18C  
AVIL  
CRISPLD2  
SNTB1  
CDSN  
PDE3B  
RALGPS2  
CBFA2T3

RNPS1  
FCGR2A  
S100A9  
B4GALT2  
CD22  
KCTD12  
C8orf45  
FLJ21820  
LAIR2  
CTAGE5  
C19orf33  
MGC39715  
KIF12  
ZNF169  
TESSP1  
MAP3K14  
SLC15A4  
MRGPRX3  
DOK3  
MERTK  
KCNK10  
LOC284837  
LLGL2  
SRD5A1  
PPP2R4  
FGFR1  
SERPINA1  
PRSSL1  
RNF126  
KCNA3  
P2RY12  
NCOR2  
ELMO3  
SNN  
PHB2  
SIGLEC5  
CNGB1  
AVP  
TIMM13  
INPP5D  
GLT1D1  
GPLD1  
AK1  
RPS2  
ASGR2  
TNFRSF9  
GNE  
SLC7A8  
SULT1C2  
C8orf44  
F2RL2  
BHMT2  
C16orf50  
FSTL3  
ZNF553  
NNAT  
SLC43A3  
FLJ46072  
UHMK1  
RSHL1  
SYNE2  
JAK2  
LR8  
NDUFAF1  
SLC39A14  
C10orf93

SOD3  
TSPYL5  
HIST1H4L  
ARMC2  
KBTBD5  
TMEPAI  
MARCO  
FAM83F  
TAAR5  
FOXL1  
TNFSF13B  
PLXDC1  
ZNF454  
C6orf139  
HRASLS5  
TRIM16  
TRIP6  
PODXL2  
GPR77  
MGMT  
PTPRJ  
MRPL28  
POU3F1  
TRPM6  
HSPBP1  
UNQ3033  
HNRPF  
SEMA3B  
MPST  
CDH5  
ANKRD13C  
SLC23A1  
SUMO3  
TP53TG3  
SIGLEC9  
TYROBP  
TMSL8  
BCAP31  
DXS9879E  
F8A1  
SLC9A7  
OCRL  
RP1-112K5.2  
MPP1  
VBP1  
ARMCX4  
CXorf34  
REPS2  
GK  
PDZD4  
MGC39606  
PLXNA3  
NGFRAP1  
FAM70A  
POLA  
MED12  
PHF16  
MAGED4  
FLJ20298  
MTCP1  
TSC22D3  
CD99L2  
FAM11A  
RP11-450P7.3  
CXX1  
BEX2

GLT28D1  
CASK  
AMMECR1  
ZNF673  
FLJ10178  
CXorf9  
FAM3A  
MASK  
CXorf26  
IGSF1  
RP11-311P8.3  
ARMCX2  
SH3KBP1  
MSL3L1  
IRS4  
GABRE  
TMEM32  
BIRC4  
TRO  
CXorf17  
HADH2  
CXorf42  
FLJ14503  
PDCD8  
CDKL5  
DKFZp564K142  
BRWD3  
RNF12  
FLJ30058  
XPNPEP2  
FLJ25444  
WWC3  
LOC389852  
LMO6  
FLJ39827  
TMEM29  
TMEM164  
CXorf53  
CHRD1  
MLLT7  
ARD1A  
RP3-473B4.1  
RAB9B  
TLR8  
GPRASP2  
CXorf38  
CXorf41  
SSR4  
GABRA3  
PFC  
PCYT1B  
GPR173  
FLJ11016  
DRP2  
ITM2A  
MYCL2  
SMARCA1  
LOC203427  
SUHW3  
STK23  
EGFL6  
ZNF6  
FLJ31204  
ITGB1BP2  
CLDN2  
AVPR2



BMX  
FSHPRH1  
KIAA1166  
ZCCHC5  
NSBP1  
GAB3  
COVA1  
NOX1  
RBBP7  
MORF4L2  
FRMPD4  
MAGED1  
PNPLA4  
L1CAM  
CXorf21  
TCEAL3  
TMEM35  
TCEAL4  
CYSLTR1  
NLGN3  
PCTK1  
CLIC2  
GLRA2  
PLXNB3  
AGTR2  
TLR7  
BGN  
RENBP  
PRRG3  
SMC1L1  
KCND1  
CXorf12

---
